# Supplementary material for: Multi-channel photodissociation dynamics of 14N2 in its b′ 1Σ+u(ν = 20) state
Source: Royal Society of Chemistry journal article supplement (doi:10.1039/d2cp01148d), 2022-01-01
Supplement: d2cp01148d1.pdf [file d2cp01148d1.pdf]

***Supplementary materials for***

**Multi-channel photodissociation dynamics of  $^{14}\text{N}_2$  in its  $b' \ ^1\Sigma^+ \ u(v=20)$  state**

Pan Jiang<sup>1,2</sup>, Liya Lu<sup>1,2</sup>, Min Liu<sup>1,2</sup>, Hong Gao<sup>1,2\*</sup>

<sup>1</sup> Beijing National Laboratory for Molecular Sciences (BNLMS), Institute of Chemistry,  
Chinese Academy of Sciences, Beijing 100190, China

<sup>2</sup> University of Chinese Academy of Sciences, Beijing 100049, China

\* Email address: honggao2017@iccas.ac.cn (Hong Gao)

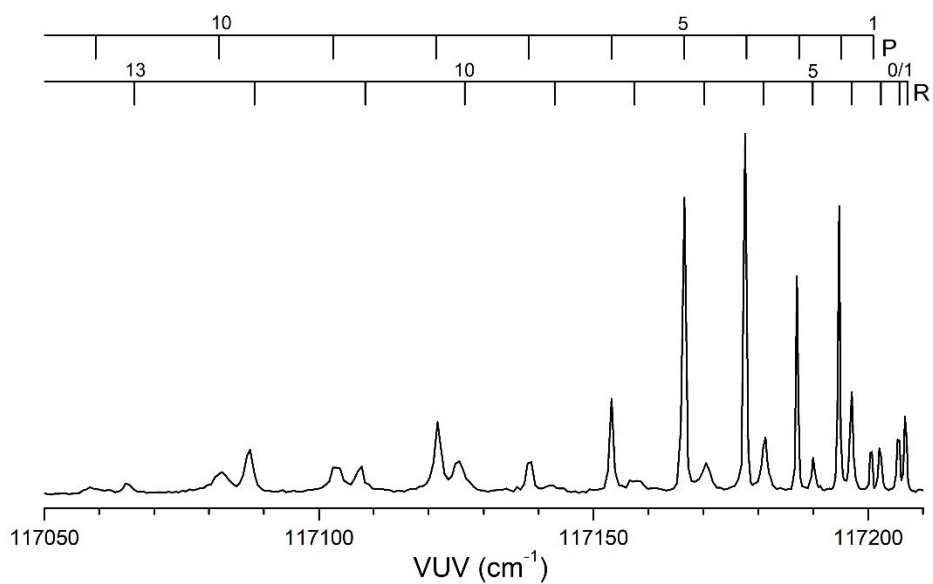

**Figure S1** PHOFEX spectrum by detecting  $\text{N}(^2\text{D}_{3/2})$  for the  $b' \ ^1\Sigma^+ \ u(v=20)$  state of  $^{14}\text{N}_2$ . The intensities of the spectrum are not calibrated with the VUV laser intensity.

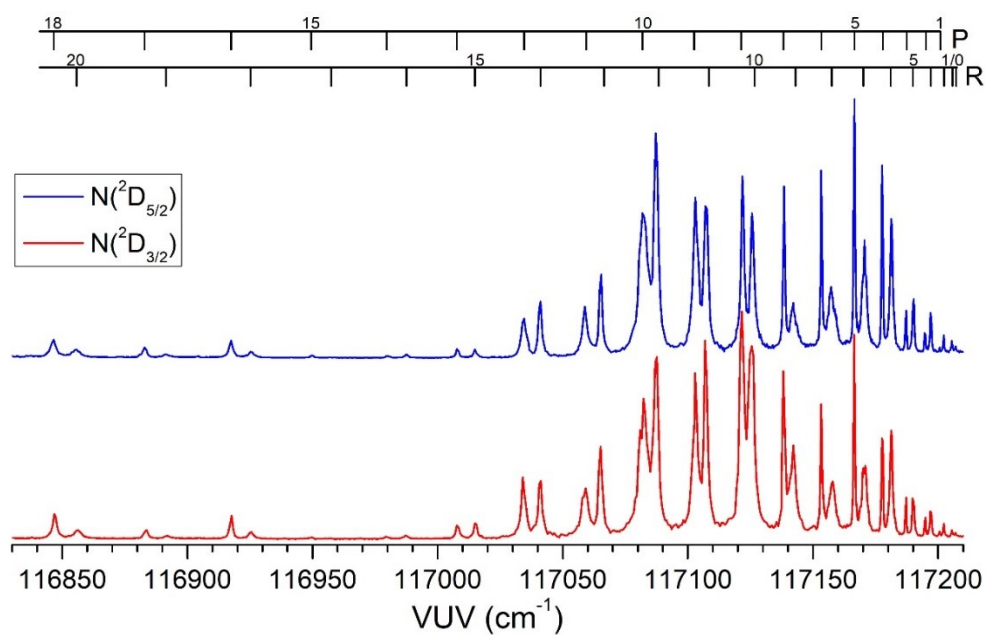

**Figure S2** PHOFEX spectra by detecting N(<sup>2</sup>D<sub>5/2</sub>) (blue curve) and N(<sup>2</sup>D<sub>3/2</sub>) (red curve) for the *b'* <sup>1</sup>Σ<sup>+</sup> u(v=20) state of <sup>14</sup>N<sub>2</sub> by using a thermalized molecular beam (see main text for details). The intensities of the spectra are not calibrated with the VUV laser intensity. The disappearance of the rotational transitions between 116930 cm<sup>-1</sup> and 117000 cm<sup>-1</sup> is mainly due to relatively weak VUV intensity in this range.

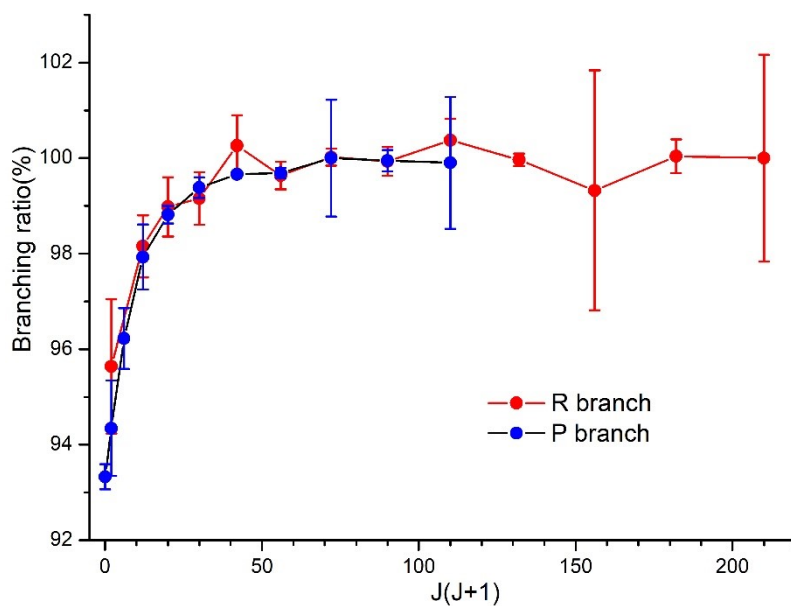

**Figure S3** Relative branching ratios  $BR(^2D_{5/2})$  measured by detecting  $N(^2D_{5/2})$ . The results are plotted versus  $J(J+1)$ , and  $J$  is rotational quantum number of the upper level. The error bars represent the standard deviations ( $1\sigma$ ) of 3-6 independent measurements.

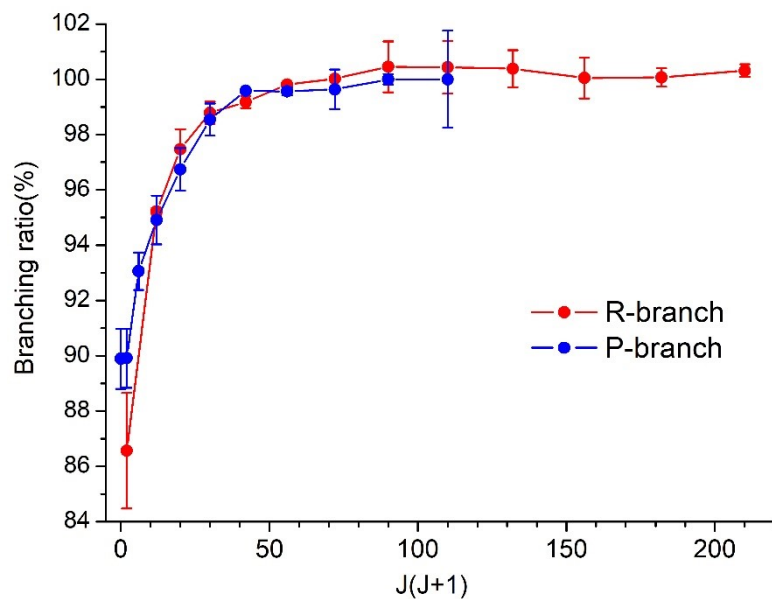

**Figure S4** Relative branching ratios  $BR(^2D_{3/2})$  measured by detecting  $N(^2D_{3/2})$ . The results are plotted versus  $J(J+1)$ , and  $J$  is rotational quantum number of the upper level. The error bars represent the standard deviations ( $1\sigma$ ) of 3-6 independent measurements.

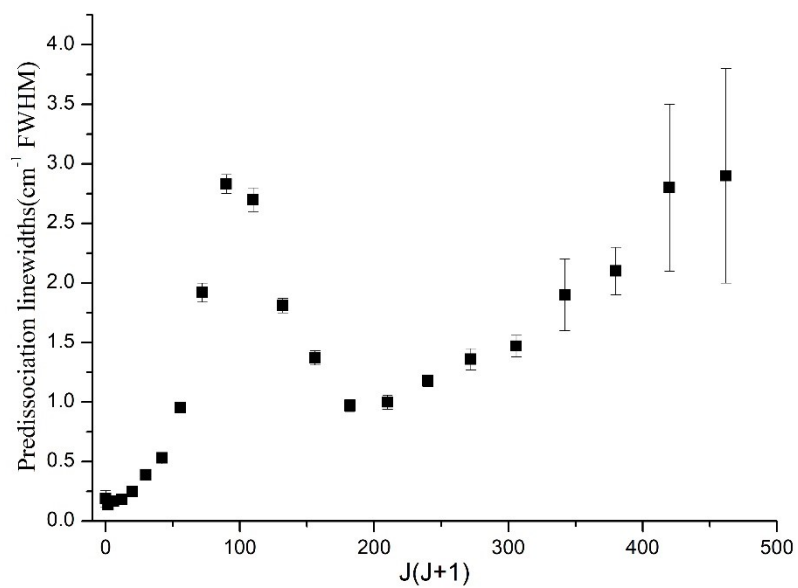

**Figure S5** Measured predissociation linewidths of the  $b' \ ^1\Sigma^+ \ u(v=20)$  state of  $^{14}\text{N}_2$  from Refs. 21 and 27.

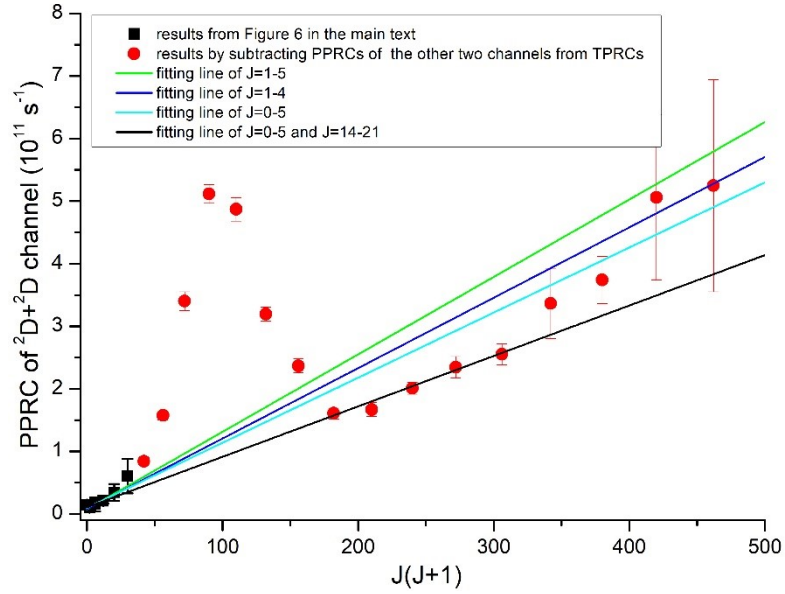

**Figure S6** PPRCs of channel  $N(^2D_{3/2,5/2})+N(^2D_{3/2,5/2})$ . Black squares are values from Figure 6 in main text. Red dots represent values by subtracting PPRCs of channels  $N(^4S)+N(^2D_{3/2,5/2})$  and  $N(^4S)+N(^2P_{1/2,3/2})$  from TPRCs by assuming that PPRCs of  $N(^4S)+N(^2D_{3/2,5/2})$  and  $N(^4S)+N(^2P_{1/2,3/2})$  are independent of  $J$ . The error bars are inherited from TPRCs only. The straight lines are linear fittings of the values for  $J=1-5$ ,  $J=1-4$ ,  $J=0-5$  and  $J=0-5,14-21$  respectively.

**Table S1** Relative branching ratios  $BR(^2D_{5/2})$ ,  $BR(^2D_{3/2})$  and  $BR(^4S)$  for the  $b' \ ^1\Sigma^+ u(v=20)$  state of  $^{14}N_2$  measured by detecting  $N(^2D_{5/2})$ ,  $N(^2D_{3/2})$  and  $N(^4S)$  respectively. The standard deviation ( $1\sigma$ ) is calculated from a total of 3-6 independent measurements.

| VUV( $cm^{-1}$ ) | Rotational transition | $BR(^2D_{5/2})$ |           | $BR(^2D_{3/2})$ |           | $BR(^4S)$ |           |
|------------------|-----------------------|-----------------|-----------|-----------------|-----------|-----------|-----------|
|                  |                       | %               | $1\sigma$ | %               | $1\sigma$ | %         | $1\sigma$ |
| 117207.2         | R(0,1)                | 95.6            | 1.4       | 86.6            | 2.1       | 94.4      | 0.2       |
| 117205.7         | R(2)                  | 98.2            | 0.7       | 95.2            | 0.1       | 93.4      | 1.4       |
| 117202.3         | R(3)                  | 99.0            | 0.6       | 97.5            | 0.7       | 94.3      | 0.5       |
| 117200.9         | P(1)                  | 93.3            | 0.3       | 89.9            | 1.1       | 93.7      | 1.3       |
| 117197.0         | R(4)                  | 99.2            | 0.6       | 98.8            | 0.4       | 95.2      | 0.2       |
| 117195.1         | P(2)                  | 94.3            | 1.0       | 89.9            | 1.1       | 94.3      | 0.4       |
| 117189.9         | R(5)                  | 100.3           | 0.6       | 99.2            | 0.2       | -□        | -□        |
| 117187.4         | P(3)                  | 96.2            | 0.6       | 93.1            | 0.7       | 95.2      | 0.9       |
| 117181.0         | R(6)                  | 99.6            | 0.3       | 99.8            | 0.1       | -□        | -□        |
| 117177.9         | P(4)                  | 97.9            | 0.7       | 94.9            | 0.9       | 94.7      | 0.3       |
| 117170.2         | R(7)                  | 100.0           | 0.2       | 100.0           | 0.0       | -□        | -□        |
| 117166.5         | P(5)                  | 98.8            | 0.2       | 96.7            | 0.8       | 94.8      | 0.2       |
| 117157.5         | R(8)                  | 99.9            | 0.3       | 100.5           | 0.9       | -□        | -□        |
| 117153.3         | P(6)                  | 99.4            | 0.2       | 98.5            | 0.6       | 95.3      | 0.6       |
| 117143.0         | R(9)                  | 100.4           | 0.4       | 100.4           | 1.0       | -□        | -□        |
| 117138.2         | P(7)                  | 99.7            | 0.0       | 99.6            | 0.1       | -□        | -□        |
| 117126.6         | R(10)                 | 100.0           | 0.1       | 100.4           | 0.7       | -□        | -□        |
| 117121.3         | P(8)                  | 99.7            | 0.1       | 99.6            | 0.1       | -□        | -□        |
| 117108.4         | R(11)                 | 99.3            | 2.5       | 100.0           | 0.7       | -□        | -□        |
| 117102.5         | P(9)                  | 100.8           | 1.2       | 99.6            | 0.7       | -□        | -□        |
| 117088.3         | R(12)                 | 100.0           | 0.4       | 100.1           | 0.3       | -□        | -□        |
| 117081.9         | P(10)                 | 99.9            | 0.2       | 100.1           | 0.2       | -□        | -□        |
| 117066.4         | R(13)                 | 100.4           | 2.2       | 100.3           | 0.2       | -□        | -□        |
| 117059.4         | P(11)                 | 99.9            | 1.4       | 100.2           | 1.8       | -□        | -□        |
